# Supplementary material
Source: PubMed Central journal article supplement (PMC7414744)
Supplement: 12909_2020_2167_MOESM3_ESM.pdf [file 12909_2020_2167_MOESM3_ESM.pdf]

**A**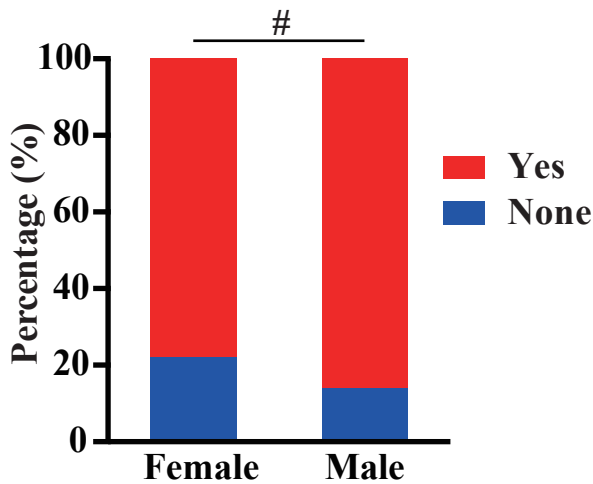**B**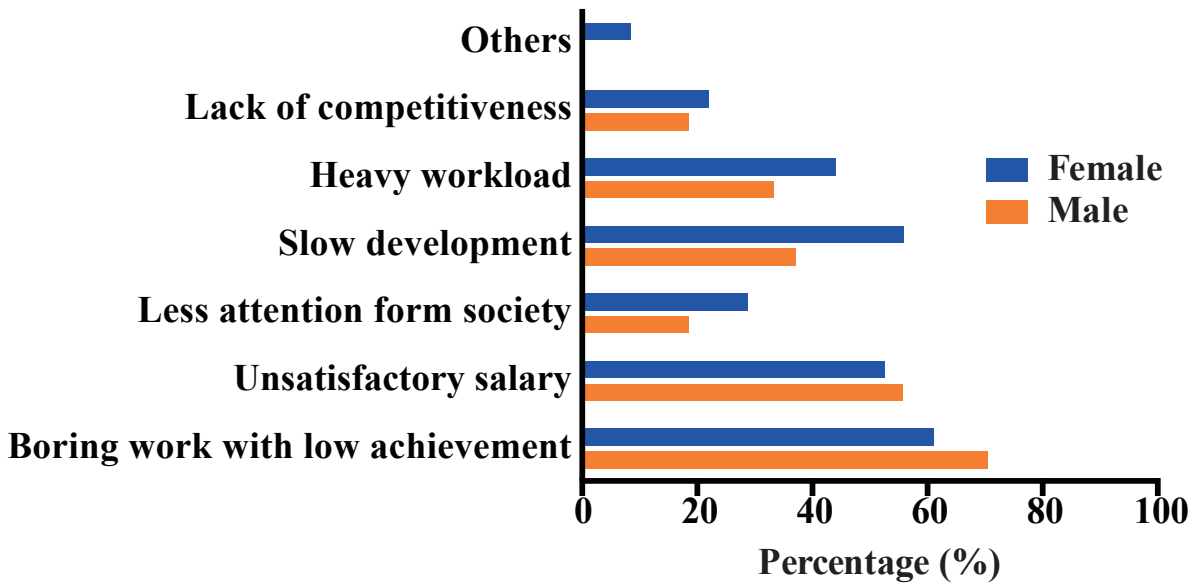

(A) The result is the percentage of students who have ever attended online study or not in female and male group, respectively. (B) The question is “Why don’t you want to become a pathologist?”. The result is the percentage of students who chose the specific option to the total number of female and male group, respectively.
